# Supplementary material for: nGauge: Integrated and extensible neuron morphology analysis in Python
Source: bioRxiv or medRxiv preprint supplement (doi:10.1101/2021.05.13.443832), 2021-05-17
Supplement: Supplementary file [file media-1.pdf]

|                                        | Type                           | Function                                                        | Description                                                                                                          | Included in LMeasure |
|----------------------------------------|--------------------------------|-----------------------------------------------------------------|----------------------------------------------------------------------------------------------------------------------|----------------------|
| Neuron                                 | Structure                      | <i>Add Branch</i>                                               | Appends a TracingPoint object as a new branch root to the neuron                                                     | NA                   |
|                                        |                                | <i>Center Soma</i>                                              | Translates all Neuron coordinates such that the soma centroid falls on the origin (0, 0, 0).                         | NA                   |
|                                        |                                | <i>Scale</i>                                                    | Scales the neuron by a given factor along each axis                                                                  | NA                   |
|                                        |                                | <i>Translate</i>                                                | Transforms all coordinates along a given distance along each axis                                                    | NA                   |
|                                        |                                | <i>Rotate</i>                                                   | Rotates all coordinates by given angles around each axis                                                             | NA                   |
|                                        |                                | <i>Add Soma Points</i>                                          | Appends a list of points as a new soma layer to the neuron                                                           | NA                   |
|                                        | Morphometric                   | <i>Width</i>                                                    | Calculates the width of the bounding box around a given neuron                                                       | Yes                  |
|                                        |                                | <i>Height</i>                                                   | Calculates the height of the bounding box around a given neuron                                                      | Yes                  |
|                                        |                                | <i>Depth</i>                                                    | Calculates the depth of the bounding box around a given neuron                                                       | Yes                  |
|                                        |                                | <i>Soma Centroid</i>                                            | Calculates the center-of-mass of all the soma points                                                                 | No                   |
|                                        |                                | <i>Total Root Branches</i>                                      | Calculates the number of branch roots included in the neuron                                                         | Yes                  |
|                                        |                                | <i>Total Child Nodes</i>                                        | Calculates the number of child nodes included in the neuron                                                          | Yes                  |
|                                        |                                | <i>Total Tip Nodes</i>                                          | Calculates the total tip (end of branch) nodes included in the neuron                                                | Yes                  |
|                                        |                                | <i>Total Bifurcation Nodes</i>                                  | Calculates the total number of bifurcation (branching point) nodes included in the neuron                            | Yes                  |
|                                        |                                | <i>Soma Volume</i>                                              | Calculates the total volume of the neuron's soma points                                                              | Yes                  |
|                                        |                                | <i>Soma Surface Area</i>                                        | Calculates the total surface area of the neuron's soma points                                                        | Yes                  |
|                                        |                                | <i>Soma Slice Perimeter</i>                                     | Calculates the perimeter of each Z-slice defined for the soma                                                        | No                   |
|                                        |                                | <i>Persistence Diagram</i>                                      | Runs a given function over all segments and returns a list of results, can be used to implement persistence diagrams | No                   |
|                                        |                                | <i>Arborization Distance</i>                                    | Calculates the distance from the soma centroid to the average of all branch coordinates                              | No                   |
|                                        |                                | <i>Maximum Branch Angle</i>                                     | Finds the largest branching angle in the Neuron                                                                      | Yes                  |
|                                        |                                | <i>Minimum Branch Angle</i>                                     | Finds the minimum branching angle in the Neuron                                                                      | Yes                  |
|                                        |                                | <i>Average Branch Angle</i>                                     | Calculates the average of all branching angles in the neuron                                                         | Yes                  |
|                                        |                                | <i>Maximum Path Angle</i>                                       | Finds the largest path angle in the Neuron                                                                           | Yes                  |
|                                        |                                | <i>Median Path Angle</i>                                        | Finds the median path angle in the Neuron                                                                            | Yes                  |
|                                        |                                | <i>All Branch Angles</i>                                        | Returns a list of all branch angles in the neuron                                                                    | Yes                  |
|                                        |                                | <i>Max Tortuosity</i>                                           | Finds the largest tortuosity in the Neuron                                                                           | No                   |
|                                        | <i>Median Tortuosity</i>       | Finds the median tortuosity in the Neuron                       | No                                                                                                                   |                      |
|                                        | <i>Maximum Branching Order</i> | Calculates the highest branching order achieved by any tip node | Yes                                                                                                                  |                      |
|                                        | <i>All Segment Lengths</i>     | Returns a list of all segment lengths in the Neuron             | No                                                                                                                   |                      |
|                                        | <i>All Path Angles</i>         | Returns a list of all path angles in the Neuron                 | No                                                                                                                   |                      |
|                                        | Distributions                  | <i>Branch Order Counts</i>                                      | Returns a count list of all branch orders                                                                            | No                   |
|                                        |                                | <i>Branch Order Histogram</i>                                   | Returns a histogram of all branch orders of all bifurcations                                                         | No                   |
|                                        |                                | <i>Path Angle Histogram</i>                                     | Returns a histogram of all path angles                                                                               | No                   |
| <i>Path Distance to Soma Histogram</i> |                                | Returns a histogram of all path distances to the soma           | No                                                                                                                   |                      |

|                     |                                |                                                                                                                         |                                                                                                                              |     |
|---------------------|--------------------------------|-------------------------------------------------------------------------------------------------------------------------|------------------------------------------------------------------------------------------------------------------------------|-----|
| <b>TracingPoint</b> |                                | <i>Euclidean Distance to Soma Histogram</i>                                                                             | Returns a histogram of Euclidean distances from each TracingPoint to the soma                                                | No  |
|                     |                                | <i>Thickness Histogram</i>                                                                                              | Returns a histogram of all TracingPoint thicknesses                                                                          | No  |
|                     |                                | <i>Branch Angle Histogram</i>                                                                                           | Returns a histogram of all branch angles                                                                                     | No  |
|                     |                                | <i>Path Angles Histogram</i>                                                                                            | Returns a histogram of all path angles                                                                                       | No  |
|                     |                                | <i>Branch Angles by Branch Orders</i>                                                                                   | Performs a 2D histogram of branch angles and branch orders                                                                   | No  |
|                     |                                | <i>Branch Angles by Path Distance</i>                                                                                   | Performs a 2D histogram of branch angles and path distances                                                                  | No  |
|                     |                                | <i>Thickness by Branch Order</i>                                                                                        | Performs a 2D histogram of thickness by branch order                                                                         | No  |
|                     |                                | <i>Thickness by Path Distance</i>                                                                                       | Performs a 2D histogram of thickness by path distance                                                                        | No  |
|                     | <b>Utility</b>                 | <i>Get Main Branch</i>                                                                                                  | Finds the longest branch in the neuron and returns it                                                                        | NA  |
|                     |                                | <i>Plot</i>                                                                                                             | Generates a X, Y, or Z maximum projection of an entire neuron                                                                | No  |
|                     |                                | <i>Iterate All Points</i>                                                                                               | Iterates through all TracingPoint objects as a Python generator object                                                       | NA  |
|                     |                                | <i>From SWC</i>                                                                                                         | Imports a SWC file from either a file on the disk or a Python string object                                                  | NA  |
|                     |                                | <i>To SWC</i>                                                                                                           | Exports the neuron as a SWC to either a file or Python string object                                                         | NA  |
|                     |                                | <i>Fix Parents</i>                                                                                                      | Ensures that all nodes in the Neuron are correctly linked in the tree structure                                              | NA  |
|                     | <b>Structure</b>               | <i>Add Child</i>                                                                                                        | Adds another TracingPoint as either an extension of a single branch if one does not already exist, or as a second sub-branch | NA  |
|                     |                                | <i>Get Tip Nodes</i>                                                                                                    | Returns a list of all tip node TracingPoints                                                                                 | Yes |
|                     |                                | <i>Get Bifurcation Nodes</i>                                                                                            | Returns a list of all bifurcation node TracingPoints                                                                         | Yes |
|                     |                                | <i>Get All Nodes</i>                                                                                                    | Returns a list of all node TracingPoints                                                                                     | NA  |
|                     |                                | <i>Get All Segments</i>                                                                                                 | Returns a list of all TracingPoint pairs representing individual segments along the branch                                   | NA  |
|                     |                                | <i>Path Distance to Child</i>                                                                                           | Returns the path distance from the given point and a given child node                                                        | Yes |
|                     |                                | <i>Next Bifurcation Point</i>                                                                                           | Finds the nearest neighbor bifurcation point in the branch tree                                                              | NA  |
|                     | <i>Select Nodes</i>            | Returns all nodes which return true for a given test function, used to select TracingPoints which meet a given criteria | NA                                                                                                                           |     |
| <b>Morphometric</b> | <i>Total Children</i>          | Counts the number of subbranches present at this TracingPoint                                                           | Yes                                                                                                                          |     |
|                     | <i>Total Child Nodes</i>       | Recursively counts the number of TracingPoints that make up all subbranches of this TracingPoint                        | Yes                                                                                                                          |     |
|                     | <i>Total Tip Nodes</i>         | Counts the total number of child nodes which are tips nodes                                                             | Yes                                                                                                                          |     |
|                     | <i>Total Bifurcation Nodes</i> | Counts the total number of child nodes which are bifurcation nodes                                                      | Yes                                                                                                                          |     |
|                     | <i>Is Tip Node</i>             | Returns True if the node is a tip node                                                                                  | Yes                                                                                                                          |     |
|                     | <i>Is Bifurcation Node</i>     | Returns True if the node is a bifurcation node                                                                          | Yes                                                                                                                          |     |
|                     | <i>Is Root Node</i>            | Returns True if the node is a root node                                                                                 | Yes                                                                                                                          |     |
|                     | <i>Path Distance to Root</i>   | Calculates the total path distance from this node to the soma                                                           | Yes                                                                                                                          |     |
|                     | <i>Width</i>                   | Calculates the width of a bounding box around the branch                                                                | Yes                                                                                                                          |     |
|                     | <i>Height</i>                  | Calculates the height of a bounding box around the branch                                                               | Yes                                                                                                                          |     |
|                     | <i>Depth</i>                   | Calculates the depth of a bounding box around the branch                                                                | Yes                                                                                                                          |     |
|                     | <i>Volume</i>                  | Calculates the volume of a bounding box around the branch                                                               | Yes                                                                                                                          |     |

|         |         |                              |                                                                            |     |
|---------|---------|------------------------------|----------------------------------------------------------------------------|-----|
| Utility |         | <i>Distance to Ends</i>      | Calculates the Euclidean distance to each child tip node                   | Yes |
|         |         | <i>Path Distance to Ends</i> | Calculates the path distance to each child tip node                        | Yes |
|         |         | <i>Partition Asymmetry</i>   | Calculates the partition asymmetry of this node                            | Yes |
|         |         | <i>Neurite Tortuosity</i>    | Calculates the tortuosity of the neurite                                   | No  |
|         |         | <i>Branching Order</i>       | Calculates the branching order of this node                                | Yes |
|         | Utility | <i>Euclidean Distance</i>    | Calculates the Euclidean distance between two TracingPoints                | NA  |
|         |         | <i>Slice Surface Area</i>    | Calculates the surface area of a collections of points that define a slice | NA  |
|         |         | <i>Slice Perimeter</i>       | Calculates the perimeter of a collection of points that define a slice     | NA  |
|         |         | <i>To SWC</i>                | Exports this branch to a SWC file                                          | NA  |
|         |         | <i>Fix Parents</i>           | Corrects linkages for all TracingPoint children of this node               | NA  |
|         | Math    | <i>Rotation Matrix</i>       | Calculates a standard rotation matrix of three angles                      | NA  |
|         |         | <i>Tangent from Points</i>   | Calculates a tangent vector from a list of points                          | NA  |
|         |         | <i>Dot Product</i>           | Performs the dot product of two vectors                                    | NA  |
|         |         | <i>Absolute Dot Product</i>  | Calculates the absolute value of the dot product                           | NA  |

**Table 1 Implemented *nGauge* Functions**

All functions implemented in *nGauge*. Along the left hand side, functions are divided into different modules and function types.
